# Supplementary material for: Polymerisable squaramide receptors for anion binding and sensing
Source: Royal Society of Chemistry journal article supplement (doi:10.1039/c4tc01776e), 2014-01-01
Supplement: c4tc01776e1.pdf [file c4tc01776e1.pdf]

## Supporting Information

### Polymerisable squaramide receptors for anion binding and sensing

*Panagiotis Manesiotis\**, *Alberta Riley* and *Bert Bollen*

#### Detailed analytical data

*3-ethoxy-4-((4-vinylphenyl)amino)cyclobut-3-ene-1,2-dione (2)*:  $^1\text{H}$  NMR (400 MHz, DMSO- $d_6$ ,  $\delta$ ): 10.76 (br, 1H, NH), 7.42 (m, 2H, Ar H), 7.31 (m, 2H, Ar H), 6.64 (dd, 1H, vinyl CH), 5.73 (dd, 1H, vinyl CH<sub>2</sub>), 5.16 (dd, 1H, vinyl CH<sub>2</sub>), 4.73 (q, 2H, CH<sub>2</sub>), 1.38 (t, 3H, CH<sub>3</sub>);  $^{13}\text{C}$  NMR (100MHz, DMSO- $d_6$ ,  $\delta$ ): 184.2, 169.8, 138.1, 136.4, 133.5, 127.4, 120.1, 114.0, 70.2, 16.2. ESI-MS  $m/z$ : 266.1 [M+Na]<sup>+</sup> (100%), 244.1 [M+H]<sup>+</sup> (19%); HRMS (ESI)  $m/z$ : [M+H]<sup>+</sup> calcd for C<sub>14</sub>H<sub>14</sub>NO<sub>3</sub>, 244.0974; found, 244.0956.

*3,4-bis((4-vinylphenyl)amino)cyclobut-3-ene-1,2-dione (3)*:  $^1\text{H}$  NMR (400 MHz, DMSO- $d_6$ ,  $\delta$ ): 9.89 (br, 2H, NH), 7.44 (m, 8H, Ar H), 6.65 (dd, 2H, vinyl CH), 5.73 (dd, 2H, vinyl CH<sub>2</sub>), 5.16 (dd, 2H, vinyl CH<sub>2</sub>);  $^{13}\text{C}$  NMR (100MHz, DMSO- $d_6$ ,  $\delta$ ): 182.1, 165.9, 138.6, 136.4, 132.8, 127.7, 119.1, 113.7. ESI-MS  $m/z$ : 339.2 [M+Na]<sup>+</sup>, 317.2 [M+H]<sup>+</sup> (39.4%); HRMS (ESI)  $m/z$ : [M+H]<sup>+</sup> calcd for C<sub>20</sub>H<sub>17</sub>N<sub>2</sub>O<sub>2</sub>, 317.1290; found, 317.1284.

*3-(phenylamino)-4-((4-vinylphenyl)amino)cyclobut-3-ene-1,2-dione (4)*:  $^1\text{H}$  NMR (400 MHz, DMSO- $d_6$ ,  $\delta$ ): 9.88 (br, 1H, NH), 9.83 (br, 1H, NH), 7.45 (m, 6H, Ar H), 7.36 (t, 2H, Ar H), 7.04 (t, 1H, Ar H), 6.65 (dd, 1H, vinyl CH), 5.73 (dd, 1H, vinyl CH<sub>2</sub>), 5.16 (dd, 1H, vinyl CH<sub>2</sub>);  $^{13}\text{C}$  NMR (100MHz, DMSO- $d_6$ ,  $\delta$ ): 182.1, 166.2, 165.9, 139.0, 138.7, 136.4, 132.8, 130.0, 127.7, 123.9, 119.1, 119.0, 113.6. ESI-MS  $m/z$ : 289.0 [M-H]<sup>-</sup> (100%); HRMS (ESI)  $m/z$ : [M+H]<sup>+</sup> calcd for C<sub>18</sub>H<sub>15</sub>N<sub>2</sub>O<sub>2</sub>, 291.1134; found, 291.1131.

*3-((3-nitrophenyl)amino)-4-((4-vinylphenyl)amino)cyclobut-3-ene-1,2-dione (5)*:  $^1\text{H}$  NMR (400 MHz, DMSO- $d_6$ ,  $\delta$ ): 10.16 (br, 1H, NH), 9.96 (br, 1H, NH), 8.38 (s, 1H, Ar H), 7.84 (dd, 1H, Ar H), 7.75 (dd, 1H, Ar H), 7.40 (dd, 4H, Ar H), 6.65 (dd, 1H, vinyl CH), 5.73 (dd, 1H, vinyl CH<sub>2</sub>), 5.16 (dd, 1H, vinyl CH<sub>2</sub>);  $^{13}\text{C}$  NMR (100MHz, DMSO- $d_6$ ,  $\delta$ ): 182.3, 166.5, 165.6, 162.8, 149.1, 140.5, 138.4, 136.4, 133.1, 131.1, 127.7, 125.0, 119.3, 117.9, 113.8, 113.4. ESI-MS  $m/z$ : 333.9 [M-H]<sup>-</sup> (100%); HRMS (ESI)  $m/z$ : [M+H]<sup>+</sup> calcd for C<sub>18</sub>H<sub>14</sub>N<sub>3</sub>O<sub>4</sub>, 336.0984; found, 336.0987.

*3-((3,5-bis(trifluoromethyl)phenyl)amino)-4-((4-vinylphenyl)amino)cyclobut-3-ene-1,2-dione (6)*:  $^1\text{H}$  NMR (400 MHz, DMSO- $d_6$ ,  $\delta$ ): 10.27 (s, 1H, NH), 10.03 (s, 1H, NH), 8.00 (s, 2H, Ar H), 7.67 (s, 1H, Ar H), 7.75 (dd, 1H, Ar H), 7.40 (dd, 4H, Ar H), 6.65 (dd, 1H, vinyl CH), 5.73 (dd, 1H, vinyl CH<sub>2</sub>), 5.17 (dd, 1H, vinyl CH<sub>2</sub>);  $^{13}\text{C}$  NMR (100MHz, DMSO- $d_6$ ,  $\delta$ ): 183.3, 182.6, 166.8, 165.3, 162.8, 141.2, 138.3, 136.4, 133.2, 131.8 (q), 129.4, 128.7, 127.7, 125.0, 122.3, 119.4, 119.2, 116.0, 113.8. ESI-MS  $m/z$ : 424.9 [M-H]<sup>-</sup> (100%); HRMS (ESI)  $m/z$ : [M+H]<sup>+</sup> calcd for C<sub>20</sub>H<sub>13</sub>N<sub>2</sub>O<sub>2</sub>F<sub>6</sub>, 427.0881; found, 427.0886.

*3-(benzylamino)-4-((4-vinylphenyl)amino)cyclobut-3-ene-1,2-dione (7)*:  $^1\text{H}$  NMR (400 MHz, DMSO- $d_6$ ,  $\delta$ ): 9.66 (br, 1H, NH), 7.97 (br, 1H, NH), 7.10-7.50 (m, 9H, Ar H), 6.64 (dd, 1H, vinyl CH), 5.69 (dd, 1H, vinyl CH<sub>2</sub>), 5.12 (dd, 1H, vinyl CH<sub>2</sub>), 4.78 (s, 2H, CH<sub>2</sub>);  $^{13}\text{C}$  NMR (100MHz, DMSO- $d_6$ ,  $\delta$ ): 184.6, 180.9, 169.4, 164.0, 139.1, 139.0, 136.5, 132.2, 129.3, 128.2, 128.1, 127.7, 118.6, 116.0, 113.3. 47.8. ESI-MS  $m/z$ : 303.0 [M-H]<sup>-</sup> (100%); HRMS (ESI)  $m/z$ : [M+H]<sup>+</sup> calcd for C<sub>19</sub>H<sub>17</sub>N<sub>2</sub>O<sub>2</sub>, 305.1290; found, 305.1288.

3-((3,5-bis(trifluoromethyl)benzyl)amino)-4-((4-vinylphenyl)amino)cyclobut-3-ene-1,2-dione (**8**):  $^1\text{H}$  NMR (400 MHz,  $\text{DMSO-}d_6$ ,  $\delta$ ): 9.78 (br, 1H, NH), 8.09 (s, 2H, Ar H), 8.02 (s, 1H, Ar H), 8.00 (br, 1H, NH), 7.34-7.45 (dd, 4H, Ar H), 6.64 (dd, 1H, vinyl CH), 5.69 (dd, 1H, vinyl  $\text{CH}_2$ ), 5.12 (dd, 1H, vinyl  $\text{CH}_2$ ), 4.97 (s, 2H,  $\text{CH}_2$ );  $^{13}\text{C}$  NMR (100MHz,  $\text{DMSO-}d_6$ ,  $\delta$ ): 184.6, 181.3, 169.4, 164.5, 142.7, 139.0, 136.5, 132.3, 131.0 (q), 129.2, 127.7, 125.2, 122.5, 121.8, 118.8, 113.3. 46.7. ESI-MS  $m/z$ : 439.9  $[\text{M-H}]^-$  (100%); HRMS (ESI)  $m/z$ :  $[\text{M+H}]^+$  calcd for  $\text{C}_{21}\text{H}_{15}\text{N}_2\text{O}_2\text{F}_6$ , 441.1038; found, 441.1030.

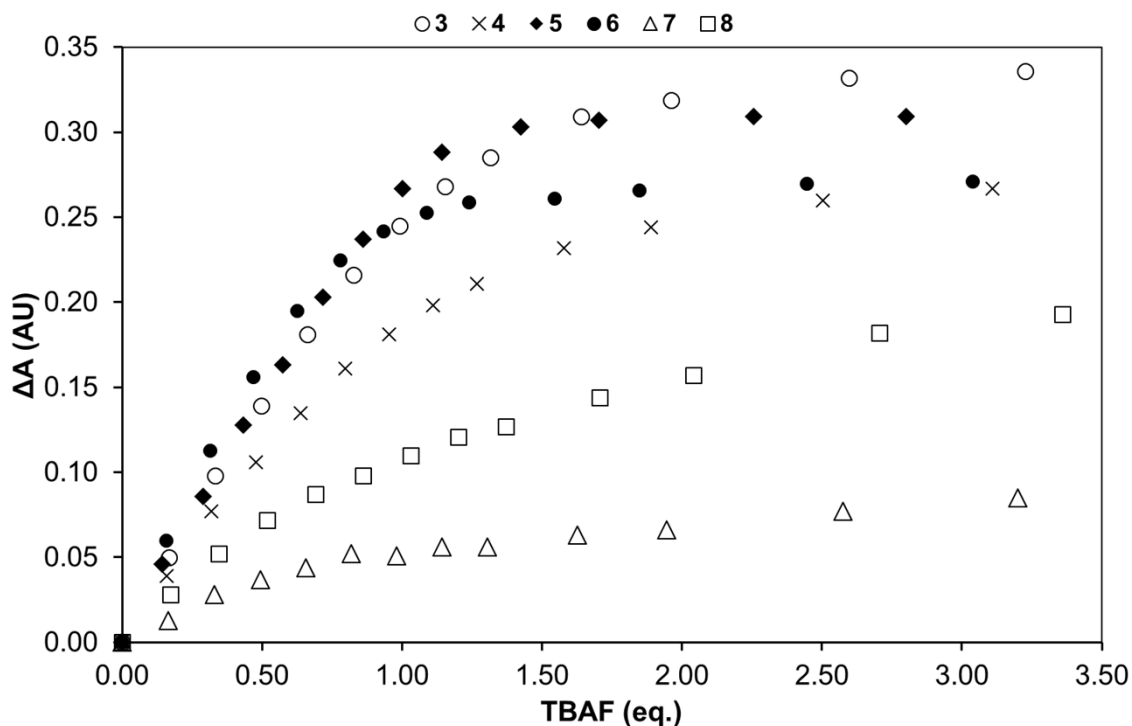

**Figure S1.** Overlay of binding isotherms obtained by UV-Vis titration of the synthesised receptors ( $1.0 \times 10^{-5}$  mol  $\text{L}^{-1}$ ) and TBAF, in DMSO. Plotted results correspond to absorbance values at 397 nm.

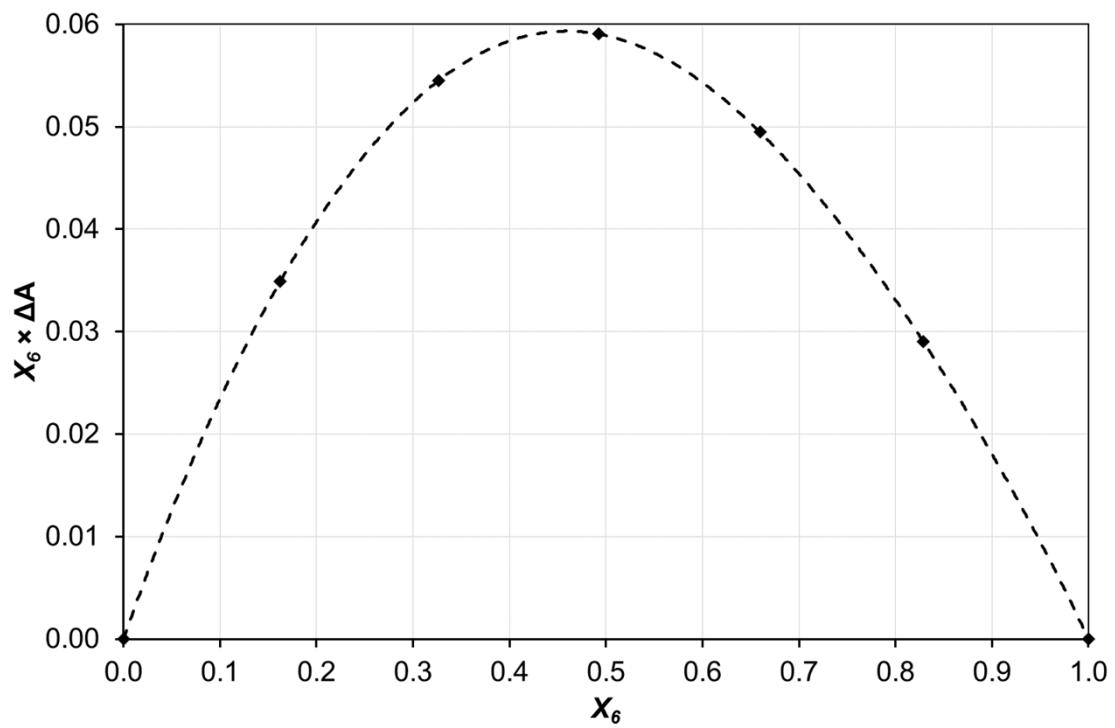

**Figure S2.** Job plot for the association of squaramide monomer **6** and TBAF.

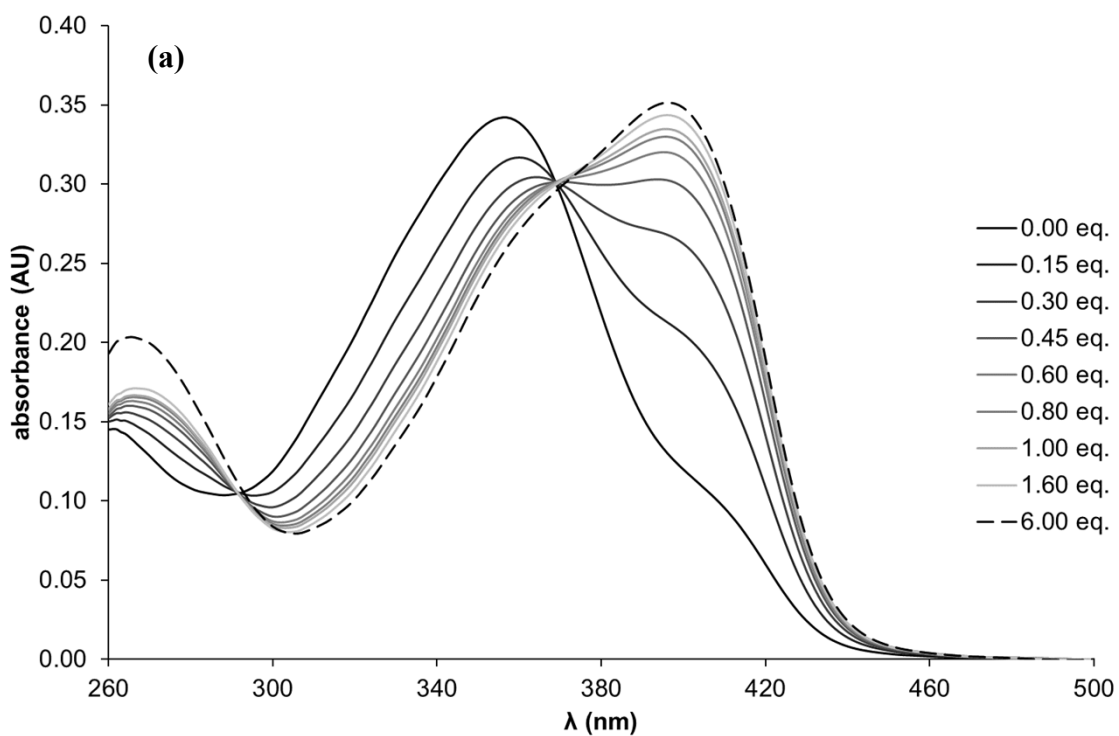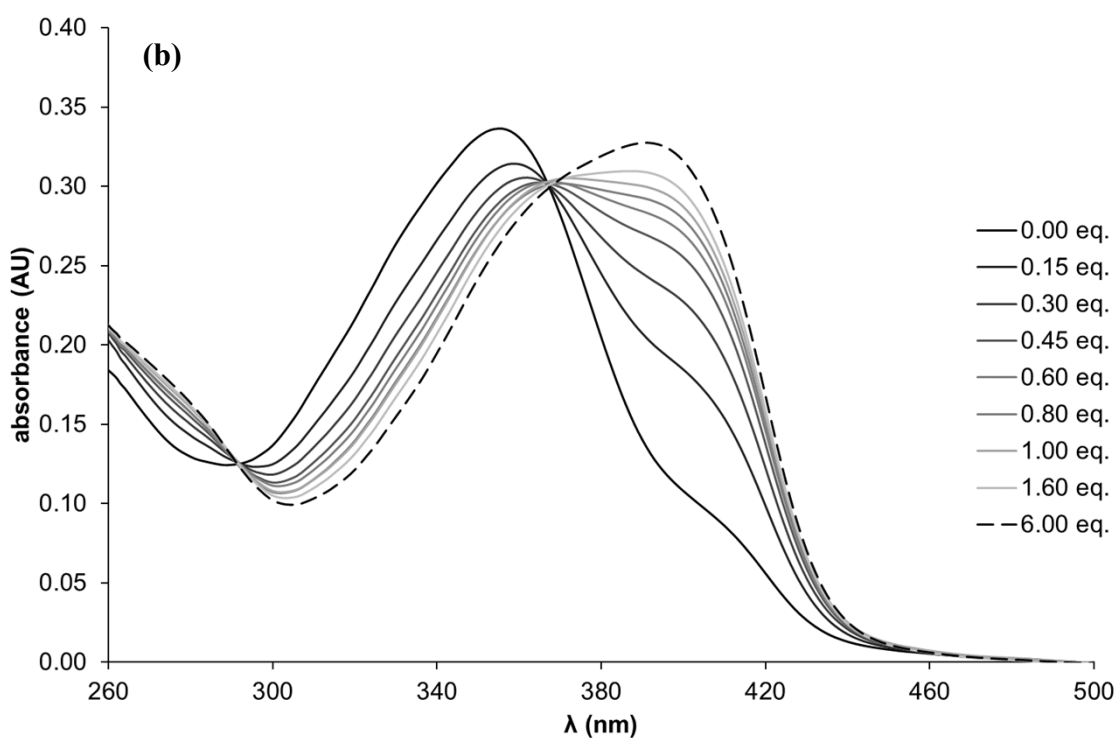

**Figure S3.** UV-Vis spectra collected during the titration of receptor **6** ( $1.0 \times 10^{-5}$  mol L<sup>-1</sup>) with (a) TBAOBz and (b) TBAP, in DMSO.

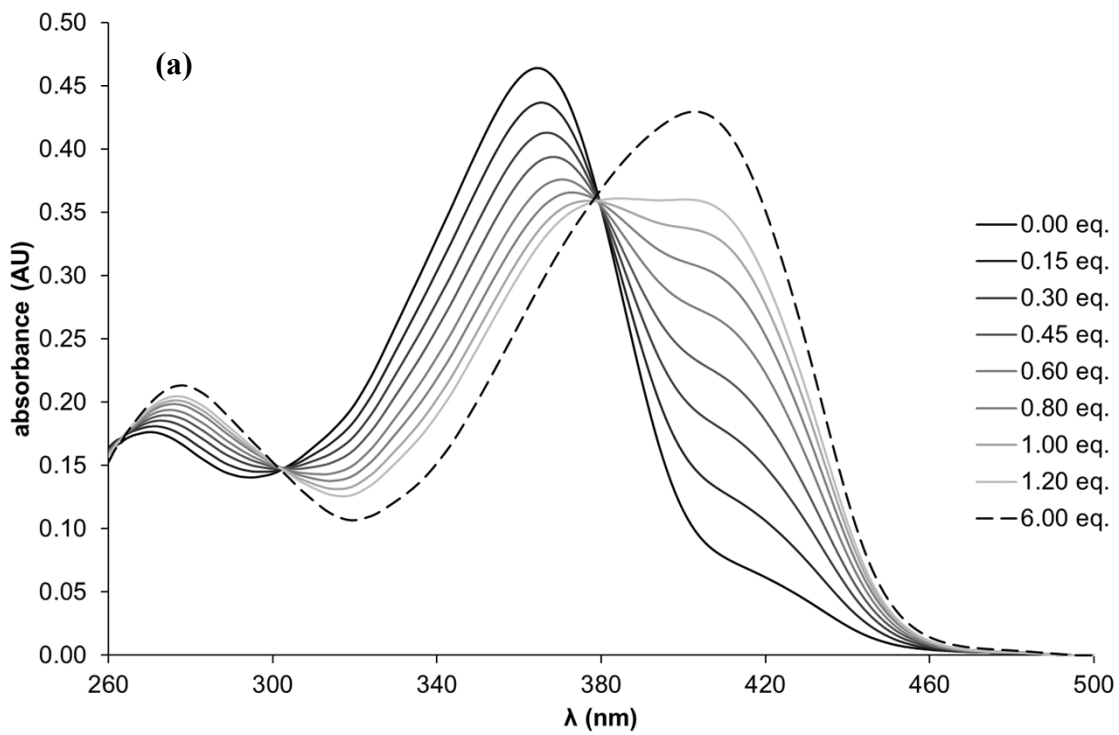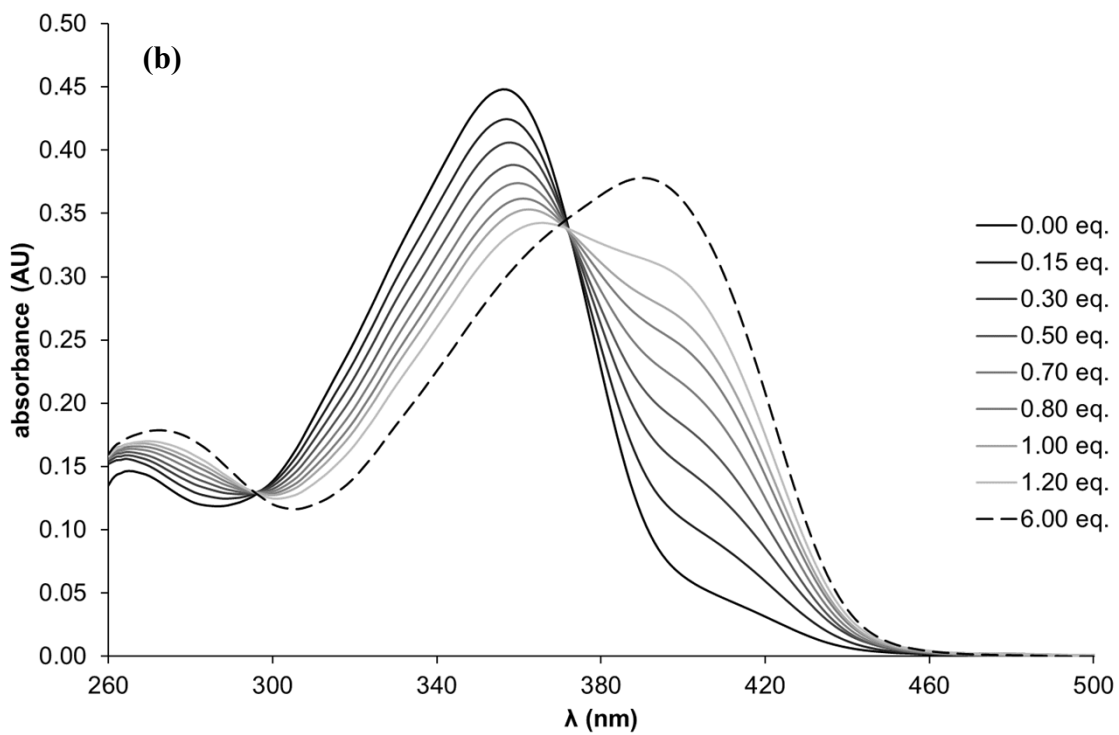

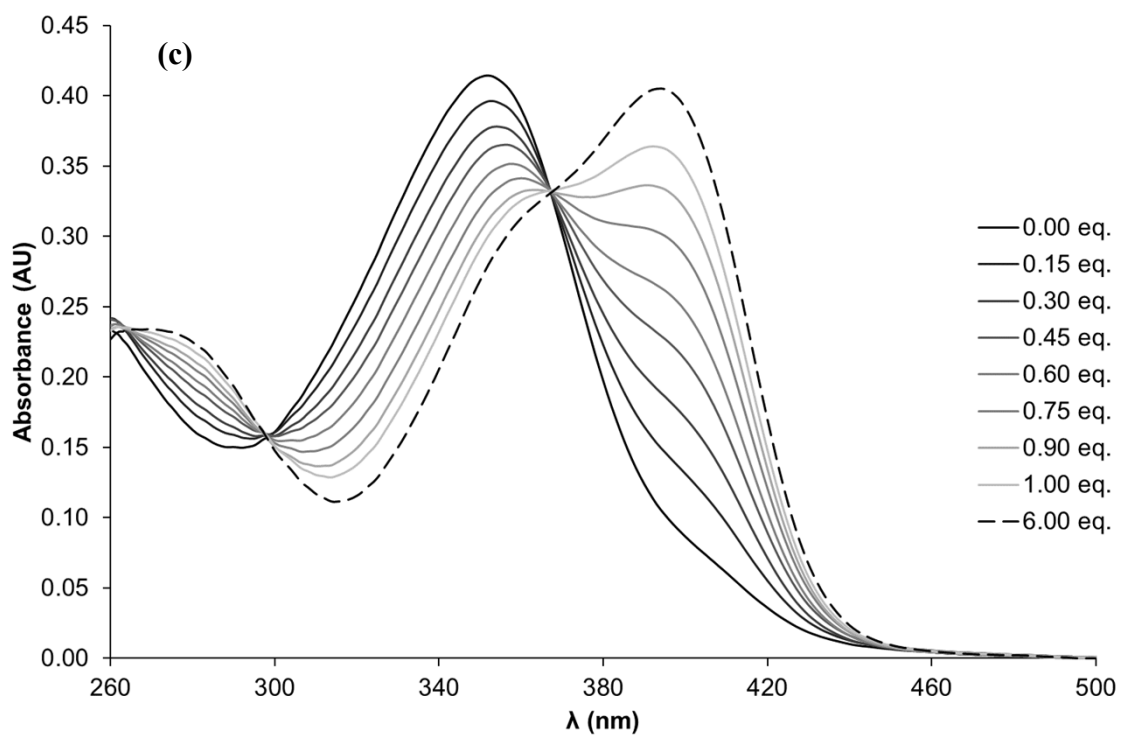

**Figure S4.** UV-Vis spectra collected during the titration of (a) receptor **3** (1.0 × 10<sup>-5</sup> mol L<sup>-1</sup>) with TBAF, (b) receptor **4** with TBAF and (c) receptor **5** with TBAF, in DMSO.

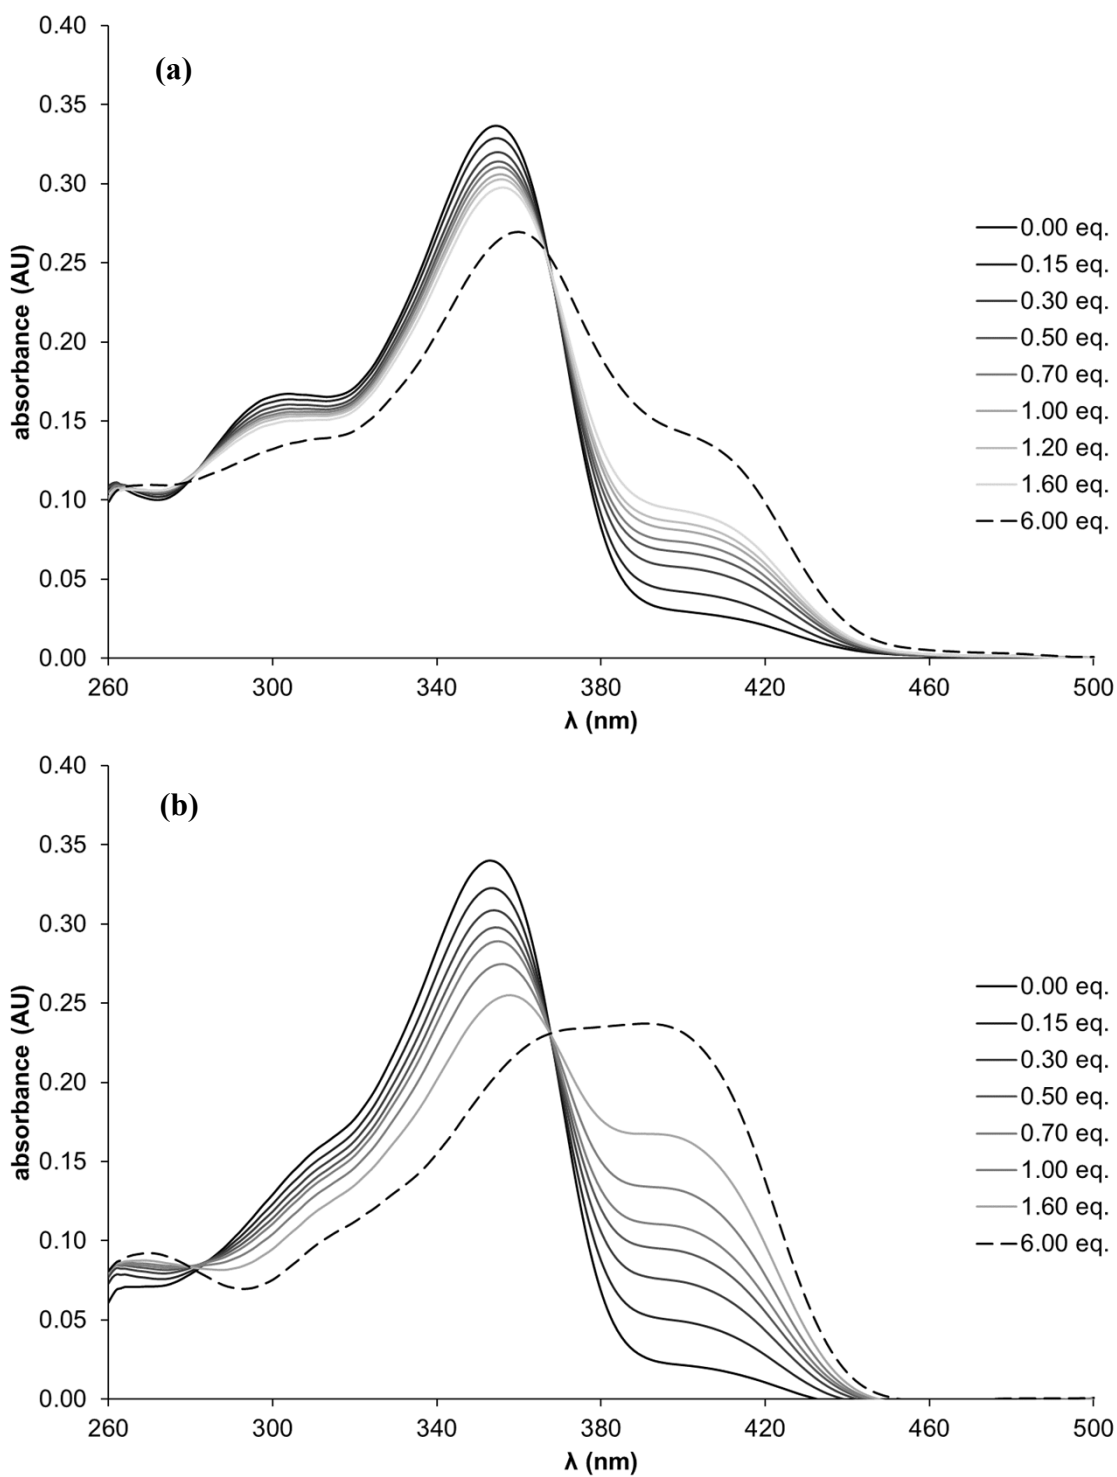

**Figure S5.** UV-Vis spectra collected during the titration of (a) receptor **7** ( $1.0 \times 10^{-5}$  mol L $^{-1}$ ) with TBAF and (b) receptor **8** with TBAF, in DMSO.

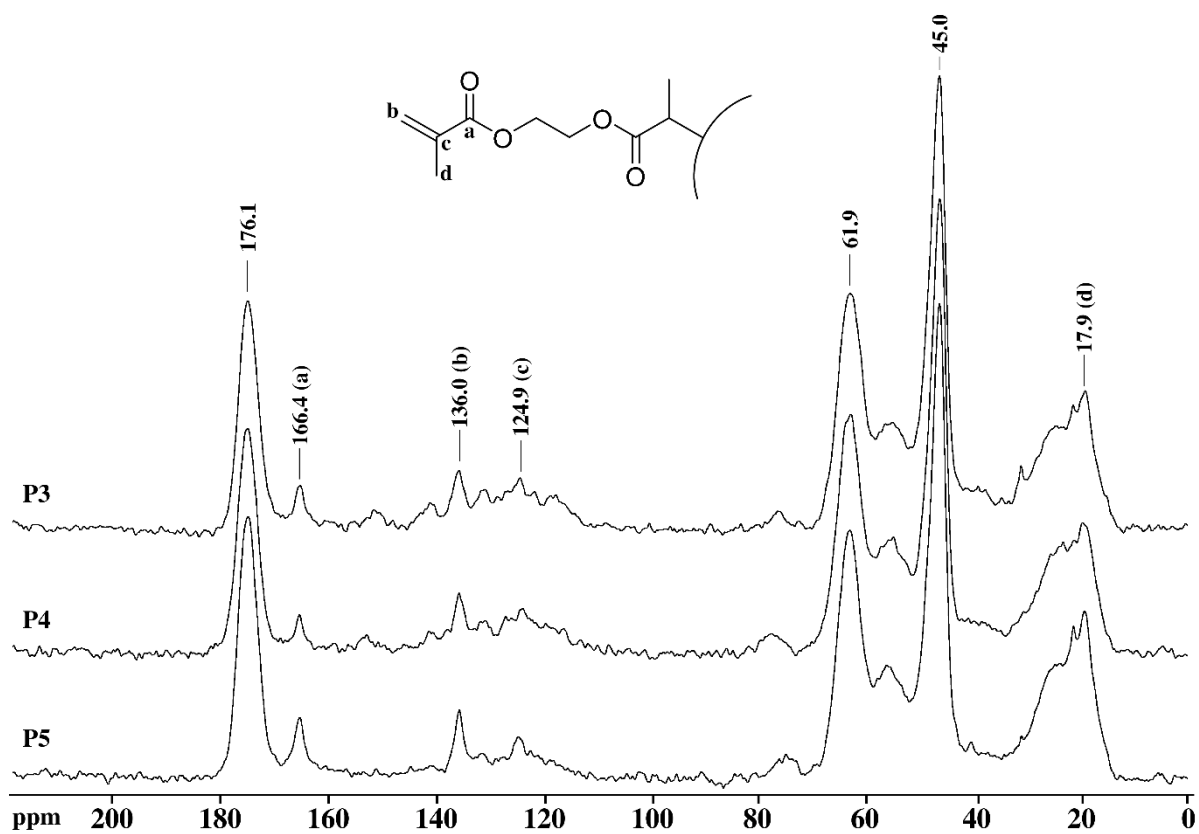

**Figure S6.**  $^{13}\text{C}$  CP-MAS solid state NMR spectra (100 MHz) of polymers **P3**, **P4** and **P5** (3.2 mm  $\text{SiN}_3$  rotors, spin rate 10 kHz, contact time 2 ms). Selected peaks are assigned to EDMA and signals (a), (b), (c) and (d) correspond to mono-reacted cross-linker units.
